# There's So Much More to PSYCHIATRIC SERVICES Than Meets the Page!

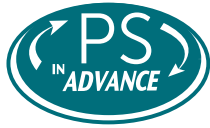

## Psychiatric Services in Advance

### Latest research reports!

#### **Brief Critical Time Intervention Reduces Rehospitalization**

A brief, three-month focus on coordination of services after hospital discharge greatly improved the "revolving door" phenomenon of frequent rehospitalization for 149 psychiatric patients in a managed behavioral health care organization.

#### **Gender Differences Among Veterans in Jail Diversion Programs**

Male and female veterans involved in jail diversion programs report unique life experiences that should be addressed by mental health services. In particular, women reported significantly higher rates of sexual assault and men reported greater substance abuse.

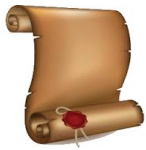

### Revisit the field's rich history!

#### **50 Years Ago in *Psychiatric Services***

- A Psychiatrist's View of Remotivation
- Hospital Paid-as-Work Therapy Programs
- Veterans Groups Fund Postdischarge Job Searches

AMERICAN  
PSYCHIATRIC  
ASSOCIATION  
PUBLISHING

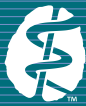

[ps.psychiatryonline.org](http://ps.psychiatryonline.org)

[www.appi.org](http://www.appi.org) • 1-800-368-5777 • Fax: 703-907-1091 • Email: [appi@psych.org](mailto:appi@psych.org) Priority Code AH1520

## APA Seeks Editor-in-Chief for *Psychiatric Services*

The American Psychiatric Association (APA) is seeking applicants for the position of Editor of *Psychiatric Services*, APA's monthly mental health services research and policy journal. The current Editor concludes his final term on December 31, 2016.

Applicants must be APA members who have knowledge of and experience in the field of mental health services research and in established and emerging evidence-based practices for people with serious mental illness.

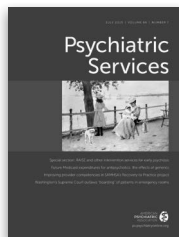

Applications are due by September 30, 2015. Candidates should submit their curriculum vitae and a cover letter outlining their qualifications by e-mail to [PSEditorSearch@psych.org](mailto:PSEditorSearch@psych.org). For further information, please contact Rebecca Rinehart, Publisher: [rrinehart@psych.org](mailto:rrinehart@psych.org), 703-907-7876.

AMERICAN  
PSYCHIATRIC  
ASSOCIATION

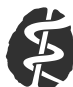

AH1535A

## Special Discounts for American Psychiatric Association members on [www.appi.org](http://www.appi.org)

**20% Discount for APA Members**

**25% Discount for  
APA Resident-Fellow Members**

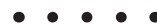

### Subscribe to APP News

for the latest information on new titles, special offers,  
and other useful information.

Sign up @ [www.appi.org](http://www.appi.org)

AMERICAN  
PSYCHIATRIC  
ASSOCIATION  
PUBLISHING

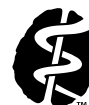

[www.appi.org](http://www.appi.org) Email: [appi@psych.org](mailto:appi@psych.org) Phone: 1-800-368-5777

AH1506N
