# DSM-5 SELECTIONS

## DSM-5® Selections

American Psychiatric Association

These selections provide a comprehensive overview of the process of diagnosing disorders while serving as a reference guide to assist in the diagnosis of individual patients. The disorder-specific resource is an invaluable addition to the DSM-5® collection and an important contribution to the mental health profession.

This book contains the critical disorder-specific content from these four titles:

- Diagnostic and Statistical Manual of Mental Disorders, Fifth Edition (DSM-5®)
- DSM-5® Clinical Cases
- DSM-5® Self-Exam Questions
- DSM-5® Guidebook

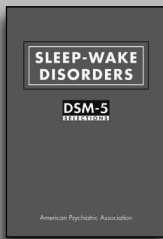

*Just Published!*

### **Sleep-Wake Disorders** DSM-5® Selections

2015 • 160 pages  
ISBN 978-1-61537-009-2  
Paperback • \$39.00  
Item #37009

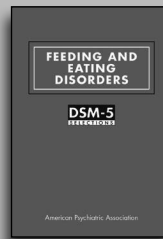

*Coming August 2015!*

### **Feeding and Eating Disorders** DSM-5® Selections

2016 • 81 pages  
ISBN 978-1-61537-012-2  
Paperback • \$39.00  
Item #37012

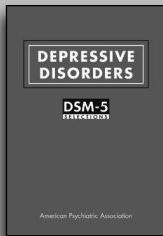

*Just Published!*

### **Depressive Disorders** DSM-5® Selections

2015 • 118 pages  
ISBN 978-1-61537-010-8  
Paperback • \$39.00  
Item #37010

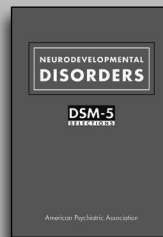

*Coming September 2015!*

### **Neurodevelopmental Disorders** DSM-5® Selections

2016 • 161 pages  
ISBN 978-1-61537-013-9  
Paperback • \$39.00  
Item #37013

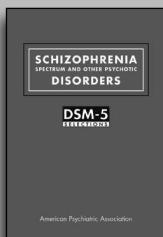

*Coming July 2015!*

### **Schizophrenia Spectrum and Other Psychotic Disorders** DSM-5® Selections

2015 • 116 pages  
ISBN 978-1-61537-011-5  
Paperback • \$39.00  
Item #37011

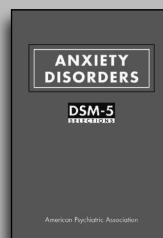

*Coming October 2015!*

### **Anxiety Disorders** DSM-5® Selections

2016 • 110 pages  
ISBN 978-1-61537-014-6  
Paperback • \$39.00  
Item #37014

AMERICAN  
PSYCHIATRIC  
ASSOCIATION  
PUBLISHING

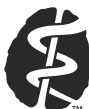

Order Online: [www.appi.org](http://www.appi.org)

Phone: 703-907-7322

Toll Free: 1-800-368-5777

Email: [appi@psych.org](mailto:appi@psych.org)

20% Discount for American Psychiatric  
Association Members

25% Discount for APA Resident-Fellow Members AH1528A

# Understanding Mental Disorders

## Your Guide to DSM-5®

American Psychiatric Association

**A consumer guide for anyone who has been touched by mental illness!**

*Understanding Mental Disorders: Your Guide to DSM-5®* is a vital resource for anyone who has been touched by mental illness.

Most of us know someone who suffers from a mental illness. This book helps those who may be struggling with mental health problems, as well as those who want to help others achieve mental health and well-being.

Based on the latest, fifth edition of the *Diagnostic and Statistical Manual of Mental Disorders*—known as DSM-5®—**Understanding Mental Disorders** provides valuable insight on what to expect from an illness and its treatment—and will help readers recognize symptoms, know when to seek help, and get the right care. Featured disorders include depression, schizophrenia, ADHD, autism spectrum disorder, posttraumatic stress disorder, and bipolar disorder, among others.

The common language for diagnosing mental illness used in DSM-5® for mental health professionals has been adapted into clear, concise descriptions of disorders for nonexperts. In addition to specific symptoms for each disorder, readers will find:

- Risk factors and warning signs
- Related disorders
- Ways to cope
- Tips to promote mental health
- Personal stories
- Key points about the disorders and treatment options
- A special chapter dedicated to treatment essentials and ways to get help
- Helpful resources that include a glossary, list of medications and support groups

For more resources and information, go to [www.psychiatry.org/UnderstandingMentalDisorders](http://www.psychiatry.org/UnderstandingMentalDisorders)

2015 • 370 pages • ISBN 978-1-58562-491-1 • Paperback • \$24.95 • Item #62491

**Just  
Published!**

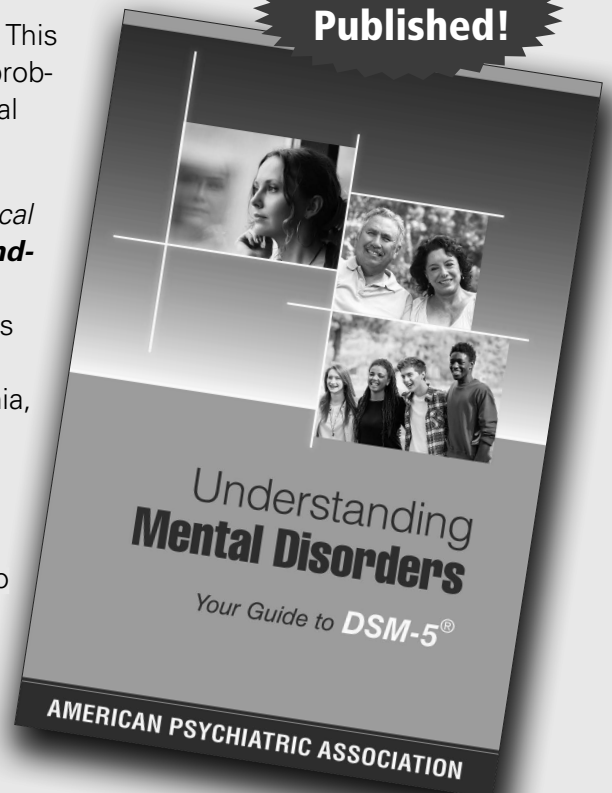

*With Foreword by  
Patrick J. Kennedy*

AMERICAN  
PSYCHIATRIC  
ASSOCIATION  
PUBLISHING

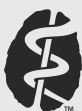

Order Online: [www.appi.org](http://www.appi.org)

Phone: 703-907-7322 • Toll Free: 1-800-368-5777

Email: [appi@psych.org](mailto:appi@psych.org)

20% Discount for American Psychiatric  
Association Members

25% Discount for APA Resident-Fellow Members AH1512A

Just  
Published!

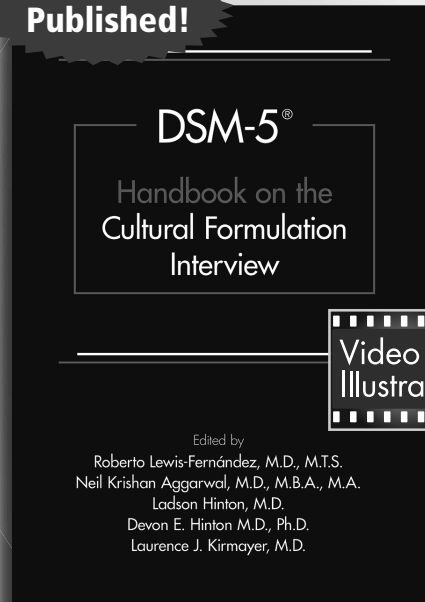

## DSM-5® Handbook on the Cultural Formulation Interview

Edited by Roberto Lewis-Fernández, M.D., M.T.S.,  
Neil Krishan Aggarwal, M.D., M.B.A., M.A.,  
Ladson Hinton, M.D., Devon E. Hinton M.D., Ph.D.,  
and Laurence J. Kirmayer, M.D.

*DSM-5® Handbook of the Cultural Formulation Interview* provides the background, context, and detailed guidance necessary to train clinicians in the use of the Cultural Formulation Interview (CFI), which was created as part of the 2007-2013 DSM revision process. The purpose of the CFI—and this unique handbook—is to make it easier for providers to account for the influence of culture in their clinical work to enhance patient-clinician communication and improve outcomes.

Cultural psychiatry as a field has evolved enormously from the days when it was principally concerned with epidemiological and clinical studies of disease prevalence; it now examines a multitude of issues, primary among them the differing patient, family, and practitioner models of illness and treatment experiences within and across cultures. The editors, all of whom have been intimately involved in the evolution of the field, have designed the book and accompanying videos for maximum instructional and clinical utility.

The *Handbook* boasts many strengths and useful features, including:

- A detailed description of each of the three CFI components: a core 16-item questionnaire, which can be applied in any clinical setting with any patient by any mental health clinician; an informant version of the core CFI used to obtain information from caregivers; and 12 supplementary modules that expand on these basic assessments. This material facilitates implementation of the CFI by clinicians.
- Over a dozen clinical vignettes are included to illustrate use of the three components, and the *Handbook* also includes multiple videos that demonstrate the application of portions of the core CFI, and several supplementary modules.
- Strategies for incorporating the CFI into clinical training are identified and discussed, furthering the objective of developing culturally-sensitive and astute practitioners.
- The theoretical bases of the CFI are explored, raising questions for discussion and identifying areas for further research.

The CFI is a valuable tool for all patients, not just those judged to be culturally different. The CFI has been called the single most practically useful contribution of cultural psychiatry and medical anthropology to clinical psychiatry, primary care, and medicine in general. *DSM-5® Handbook on the Cultural Formulation Interview* is the only book on the market that equips readers with the skills and insight to incorporate the CFI into practice, making it a critically important addition to the clinical literature.

2016 • 368 pages • ISBN 978-1-58562-492-8 • Paperback • \$65.00 • Item #62492

AMERICAN  
PSYCHIATRIC  
ASSOCIATION  
PUBLISHING

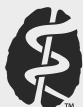

Order Online: [www.appi.org](http://www.appi.org)

Phone: 703-907-7322 • Toll Free: 1-800-368-5777

Email: [appi@psych.org](mailto:appi@psych.org)

20% Discount for American Psychiatric  
Association Members

25% Discount for APA Resident-Fellow Members AH1527A

Exceptional Careers with  
**THE SALARY  
 YOU  
 DESERVE**

## Staff Psychiatrist

**\$233,196 - \$287,592\*** annual salary

**Retention Bonus of \$10,000**

**J-1 Waiver & H-1B Visa Sponsorship**

**Leadership & Management positions also available!**

To learn more, please contact

**Dr. John Lindgren** at **209.351.7225** or

**Psychiatry.Jobs@cdcr.ca.gov.**

For additional information, you may also visit

**www.ChangingPrisonHealthCare.org**

*\*A salary increase for FY 15/16 is anticipated for this classification.*

We offer a 40-hour work week, highly competitive salary, a retirement plan that vests in only five years, and all of the security and benefits that come with State employment. Plus, **California State Prison, Sacramento** is located near family-friendly Folsom, a city that offers excellent schools and many activities including expansive bike trails, boating on Folsom Lake, and shopping at upscale boutiques.

- Generous benefits include:
- Medical (several choices)
  - Dental
  - Vision
  - Sick Leave (12 days/year)
  - Vacation (10 days/year)
  - Holidays (additional 12 days/year)
  - CME Leave (56 hours/year)
  - CME Stipend
  - Retirement Stipend (vests in 5 years)
  - 4-day work week

California Department of Corrections & Rehabilitation

Ad#S8-SAC EOE

**Psychiatric Services** (ISSN 1075-2730; online version, 1557-9700) is published monthly by the American Psychiatric Association, editorial and executive office, 1000 Wilson Blvd., Suite 1825, Arlington, VA 22209-3901. Copyright © 2015 by the American Psychiatric Association. Printed in U.S.A. Periodicals postage paid at Arlington, VA, and at additional mailing offices. POSTMASTER: Send address changes to **Psychiatric Services, 1000 Wilson Blvd., Suite 1825, Arlington, VA 22209-3901.**

## Leading the way

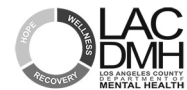

"I was attracted by the opportunity to do Telepsychiatry with DMH; it's the first time it's ever been done in an urban setting."

**Amber Kondor, MD**  
General Psychiatrist

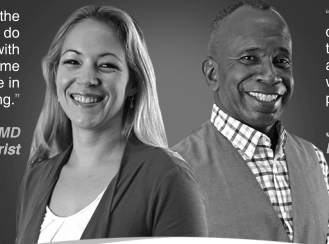

"It's a large, dynamic department, just like the city...it affords me an opportunity to work with a lot of different people."

**James R. Jones, MD**  
Regional Medical

Join the largest, most dynamic mental health department in the nation. We are creating the future of mental health services, and we are seeking physicians who are ready to join our team and push the boundaries of traditional community practice.

To learn more about employment as a psychiatrist with the Los Angeles County Department of Mental Health, including salary and benefits, please visit:

**www.psychiatristjobs.la**



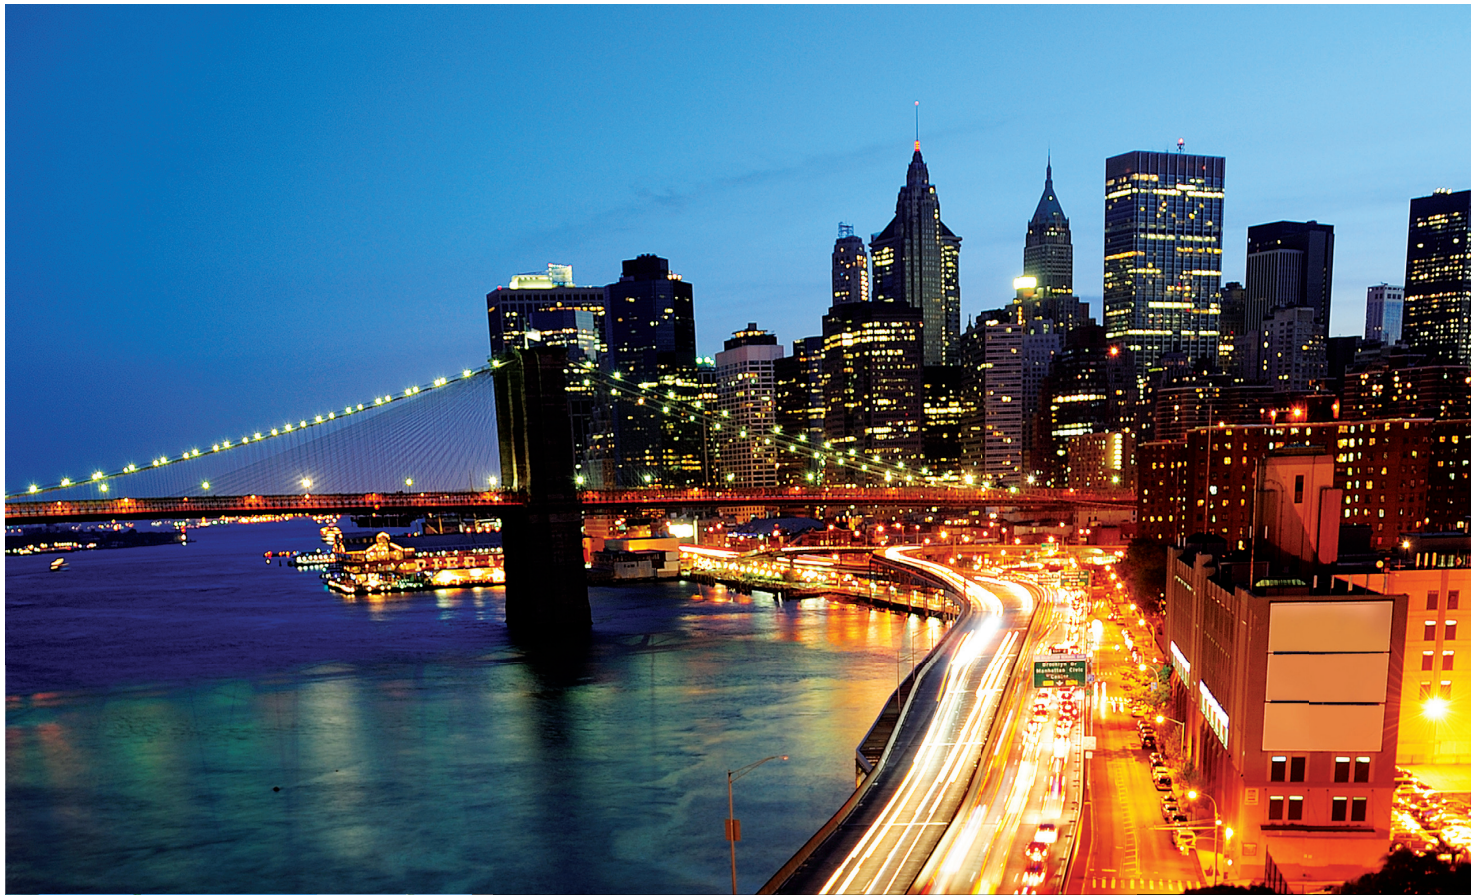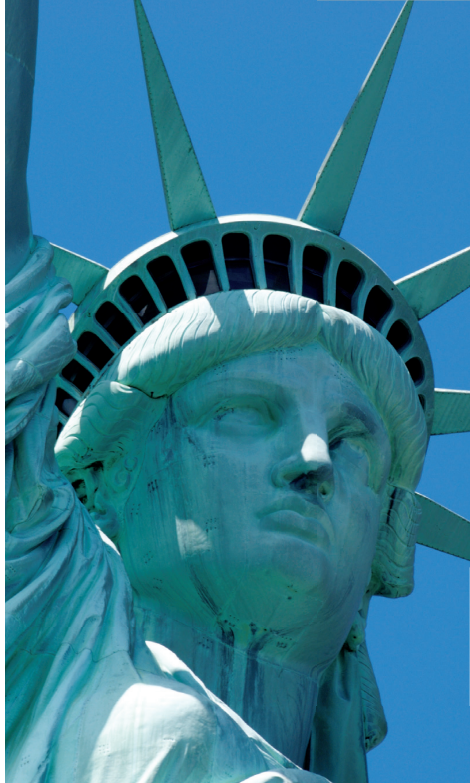

AMERICAN  
PSYCHIATRIC  
ASSOCIATION

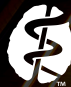

## IPS: THE MENTAL HEALTH SERVICES CONFERENCE

Oct. 8-11, 2015 • New York City

When Good Care

Confronts Red Tape:

Navigating the System for Our Patients and Our Practice

Sheraton New York Hotel & Towers

APA's Leading Educational Conference on Public, Community and Clinical Psychiatry

For more info, visit [psychiatry.org/ips](http://psychiatry.org/ips)

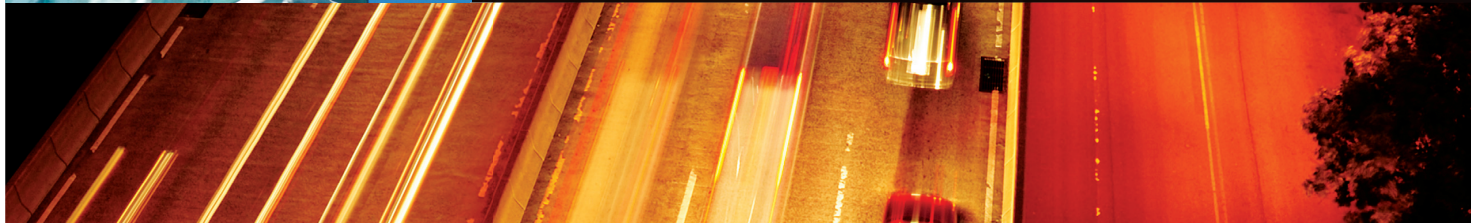

Source: https://psychiatryonline.org/doi/suppl/10.1176/ps.2015.66.issue-8/suppl_file/back.pdf
